# Supplementary material for: The Chloroplast of Chlamydomonas reinhardtii as a Testbed for Engineering Nitrogen Fixation into Plants
Source: MDPI journal article supplement (doi:10.3390/ijms22168806), 2021-08-16
Supplement: s1 [file s1]

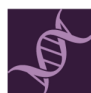

Review

# The Chloroplast of *Chlamydomonas reinhardtii* as a Testbed for Engineering Nitrogen Fixation into Plants

Marco Larrea-Álvarez<sup>1</sup> and Saul Purton<sup>2,\*</sup>

<sup>1</sup> School of Biological Sciences and Engineering, Yachay-Tech University Hacienda San José, Urcuquí-Imbabura 100650, Ecuador; malarrea@yachaytech.edu.ec

<sup>2</sup> Algal Research Group, Institute of Structural and Molecular Biology, University College London, Gower Street, London WC1E 6BT, UK; s.purton@ucl.ac.uk

\* Correspondence: s.purton@ucl.ac.uk

## Supplementary Methods

### 1. Bioinformatic analyses

We performed an *in silico* study to look for potential *nifU* and *nifS* homologs in the *C. reinhardtii* nuclear genome. Similarity searches, using *K. oxytoca* NifU (WP\_109213089.1) and NifS (CAB1215886.1) protein sequences as queries, were performed using PSI-Blast [1] against RefSeq databases; searches were limited to *C. reinhardtii* and excluded partial and predicted sequences. The NCBI CD-search tool (<https://www.ncbi.nlm.nih.gov/Structure/cdd/wrpsb.cgi>) and the ChloroP 1.1 predictor server [2] were used for conserve domain searching and subcellular localization prediction, respectively. Multiple sequence alignment was carried out using the CLUSTALW program [3]. Percentages of similarities between ChlL (ASF83651.1), NifH (VTS50234.1) and AnfH (SFW98605.1), were produced using the BLAST tool (<https://blast.ncbi.nlm.nih.gov>) [4].

### 2. pNifV chloroplast expression vector

The gene sequence encoding the homocitrate NifV from *K. oxytoca* (WP\_023322951.1) was codon-optimised according to the codon bias found in the *C. reinhardtii* plastome (sequence given below) and cloned into the pSRSapI [5] vector using SapI and SphI sites. The resulting plasmid was named pNifV.

>crnifV: 1,176 bp

```

ATGATGGGTCGTGTATTAATTAACGATACTACTTTACGTGACGGTGAACAATCTCCAGGTGTAG
CTTTCCAAGCTTCAGAAAAAATTGCTATTGCTGAAGCTTTATACGCTGCTGGTGTGAAGCTAT
GGAAGTAGGTACTCCAGCTATGGGTGAAGAAGAATGTGCTCGTATTCGTCAAGTTCGTCGTCAA
TTACCAGGTGCTACTTTAATGACATGGTGTCGTATGCAAGCTGGTGAAATTCGTCAATCAGCTG
ATTTAGGTATGGACTGGGTTGATATTTCTATTCCAGCTTCAGACAAATTACGTCAATACAAATT
ACGTGAAGGTTTACCATTATTATTAGAACGTTTAGCTGCTTTAATTCAGTTAGCTCACACTTTA
GGTTTAAAGTATGTATTGGTTGTGAAGATGCTTCACGTGCTTCTGATGCTACTTTACAAGATA
TTGCTCGTTTAGCTCGTGAAGCTGGTGCTACTCGTTTACGTTACGCTGATACTGTAGGTATTTT
AGATCCATTTACTACAGCTGCTCAAATTGCTGCTTTACGTCGTGTTGGCCAGGTGAATTAGAA
ATGCACGCTCACAACGATTTAGGTTTAGCTACTGCTAACACTTTAGCTGCTGTTTCGTGCTGGTG
CTACTTCTGTAAACACAACAGTATTAGGTTTAGGTGAACGTGCTGGTAACGCTGCTTTAGAAAC
AGTAGCTTTAGGTTTAGAACGTTGTTTAGAAGTTAAAACAGGTGTTTCGTTTCACTGCTTTACCA
GCTTTATGTGAACAAGTAGCTTTAGCTACTCGTCGTCAGTAGATCCACAACAACCATTAGTAG
GTGAATTAGTATTTACTCACGAATCAGGTGTTTACGTAGCTGCTTTATTACGTGACAGTGAATC
ATACCAAGCTATTGATCCAGCTTTATTAGGTCGTGGTTACCGTTTAGTTTTAGGTAAACACTCT
GGTCGTCAAGCTGTTAACGGTGTTTTTGACCGTATGGGTTACCACTTAACATCAGCTCAAATTG
ACCAATTATTACCAGCTTTACGTCGTTTCGCTGAAAACGGTAAACGTTCTCCACGTGATGATGA
ATTAGCTGCTATTTACCACGCTTTATGTTTCAAGCTGAACTTTACAAGCTCGTGGTTACCCATAC
GATGTTCCAGATTACGCTTAATAA

```

## References

1. Altschul, S; Madden, T; Schäffer, A; Zhang, J; Zhang, Z; Miller, W; et al. Gapped BLAST and PSI-BLAST: a new generation of protein database search programs. *Nucleic Acids Res* **1997**, *25*: 3389–402.
2. Emanuelsson O, Nielsen H, von Heijne G. ChloroP, a neural network-based method for predicting chloroplast transit peptides and their cleavage sites. *Protein Sci* **1999**, *8*: 978–984.
3. Thompson, D; Higgins, D; Gibson, T. CLUSTAL W: improving the sensitivity of progressive multiple sequence alignment through sequence weighting, position-specific gap penalties and weight matrix choice. *Nucleic Acids Res* **1994**, *11*: 4673–80.
4. Camacho, C; Coulouris, G; Avagyan, V; Ma, N; Papadopoulos, J; Bealer, K; et al. BLAST+: architecture and applications. *BMC Bioinformatics*, **2009**, *10*: 421.
5. Young, R; Purton, S. Cytosine deaminase as a negative selectable marker for the microalgal chloroplast: a strategy for the isolation of nuclear mutations that affect chloroplast gene expression. *Plant J*, **2014**, *80*: 915–925.
